# Supplementary material
Source: PubMed Central journal article supplement (PMC6604813)
Supplement: NIHMS1034100-supplement-Figures1.pdf [file NIHMS1034100-supplement-Figures1.pdf]

**Supplemental Material for: Identification, Characterization and Field Testing of *Brassica napus* Mutants Producing High-Oleic Oils**

Shuangi Bai, Steven Engelen, Peter Denolf, James G. Wallis, Katherine Lynch, Jesse D. Bengtsson, Michel Van Thournout, Boris Haesendonckx and John Browse

**Figure S1.** Amino acid sequences of three isozymes of FAD2 from *Brassica napus*.

**BnFAD2 . A5**

MGAGGRMQVSPPSKKSETDNIKRVPCETPPFTVGGELKKAIPPHCFKRSIP  
RSFSYLIWDIIIIASCFYYVATTYFPLLPHPLSYFAWPLYWACQGCVLTGV  
WVIAHECGHHAFFSDYQWLDDTVGLIFHSFLLVPYFSWKYSHRRHHSNTGS  
LERDEVFVPPKKKSDIKWYGKYLNNPLGRTVMLTVQFTLGWPLYLAFNVSG  
RPYDGGFACHFHPNAPIYNDRELRQIYISDAGILAVCYGLYRYAAVQGVA  
SMVCFYGVPLLIVNGFLVLITYLQHTHPSLPHYDSSEWDWLRGALATVDR  
DYGILNKVFHNITDTHVAHHLFSTTPHYHAMEATKAIKPILGEYYQFDGT  
PVVKAMWREAKECIYVEPDRQGEKKGVFVWYNNKL\*

**BnFAD2 . C5**

MGAGGRMQVSPPSKKSETDTIKRVPCETPPFTVGGELKKAIPPHCFKRSIP  
RSFSYLIWDIIIIASCFYYVATTYFPLLPHPLSYFAWPLYWACQGCVLTGV  
WVIAHECGHHAFFSDYQWLDDTVGLIFHSFLLVPYFSWKYSHRRHHSNTGS  
LERDEVFVPPKKKSDIKWYGKYLNNPLGRTVMLTVQFTLGWPLYLAFNVSG  
RPYDGGFACHFHPNAPIYNDRELRQIYISDAGILAVCYGLYRYAAAQGVA  
SMVCFYGVPLLIVNGFLVLITYLQHTHPSLPHYDSSEWDWLRGALATVDR  
DYGILNKVFHNITDTHVAHHLFSTMPHYHAMEATKAIKPILGEYYQFDGT  
PVVKAMWREAKECIYVEPDRQGEKKGVFVWYNNKL\*

**BnFAD2 . C1**

MGAGGRMQVSPSSPETNTLKRVPCEPFTLGDLLKKAIPPHCFKRSIP  
RSFSYLLFDIIIISSSLYHLSTAYFPLLPHPLPYLAWPLYWACQGCVLTGL  
WVIAHECGHHAFFSDHQLLDDAVGLVHFSFLLVPYFSWKYSHRRHHSNTGS  
LERDEVFVPPKKKSDVKWYGKYLNNPLGRTVMLTVQFTLGWPLYLAFNVSG  
RPYSDGFACHFHPNAPIYNDRELRQIYISDAGVLSVCYGLYRYAGSRGVA  
SMVCVYGVPLMIVNCFVLITYLQHTHPSLPHYDSSEWDWLRGALATVDR  
DYGILNKVFHNITDTHVAHHLFSTMPHYNAMEATKAIKPILGEYYQFDGT  
PVVKAMWREAKECIYVEPDRQGEKKGVFVWYNNKL\*
