# Supplementary material
Source: PubMed Central journal article supplement (PMC6604813)
Supplement: NIHMS1034100-supplement-Legends.pdf [file NIHMS1034100-supplement-Legends.pdf]

## Legends for Supporting Information

**Figure S1.** Amino acid sequences of three isozymes of FAD2 from *Brassica napus*.

**Table S1.** Fatty acid compositions of leaves (A) and roots (B) from *Brassica napus* wild type and two *Bnfad2* double-mutants. Data are mean +/- SE for three plants.

**Table S2.** Summary information for 39 mutations in the *Brassica napus* FAD2.A1 gene identified in this study.

**Table S3.** Fatty acid compositions in seeds of *Brassica napus* lines with mutations in FAD2 genes grown in a greenhouse.

**Table S4.** Distribution of 18-carbon unsaturated fatty acids in seeds of *Brassica napus* lines with mutations in FAD2 genes grown in the field.
