# Supplementary material
Source: PubMed Central journal article supplement (PMC6604813)
Supplement: NIHMS1034100-supplement-Tables1.pdf [file NIHMS1034100-supplement-Tables1.pdf]

**Table S1.** Fatty acid compositions of leaves (A) and roots (B) from *Brassica napus* wild type and two *Bnfad2* double-mutants. Data are mean +/- SE for three plants.

**A.**

| Line                | Fatty Acids (percent in total) |             |            |             |             |             |
|---------------------|--------------------------------|-------------|------------|-------------|-------------|-------------|
|                     | 16:0                           | 16:3        | 18:0       | 18:1        | 18:2        | 18:3        |
| Wild type           | 13.1 +/-0.7                    | 14.3 +/-0.5 | 2.7 +/-0.8 | 2.6 +/-0.7  | 13.4 +/-1.3 | 53.9 +/-1.5 |
| <i>Bnfad2.a5/c1</i> | 14.6 +/-0.6                    | 14.0 +/-0.7 | 2.1 +/-0.1 | 3.8 +/-0.8  | 12.7 +/-0.9 | 52.4 +/-1.9 |
| <i>Bnfad2.a5/c5</i> | 11.6 +/-0.7                    | 14.4 +/-0.8 | 1.4 +/-0.4 | 16.9 +/-3.2 | 6.9 +/-0.4  | 48.8 +/-3.1 |

**B.**

| Line                | Fatty Acids (percent in total) |            |             |             |             |
|---------------------|--------------------------------|------------|-------------|-------------|-------------|
|                     | 16:0                           | 18:0       | 18:1        | 18:2        | 18:3        |
| Wild type           | 21.5 +/-0.9                    | 3.7 +/-0.4 | 13.5 +/-0.9 | 25.7 +/-1.8 | 34.7 +/-1.1 |
| <i>Bnfad2.a5/c1</i> | 19.1 +/-0.4                    | 2.5 +/-0.3 | 26.2 +/-0.9 | 18.0 +/-1.6 | 33.7 +/-1.4 |
| <i>Bnfad2.a5/c5</i> | 12.5 +/-0.5                    | 1.8 +/-0.2 | 65.2 +/-2.5 | 3.4 +/-0.5  | 16.5 +/-0.3 |
