# Supplementary material
Source: PubMed Central journal article supplement (PMC6604813)
Supplement: NIHMS1034100-supplement-Tables2.pdf [file NIHMS1034100-supplement-Tables2.pdf]

**Table S2.** Summary information for 39 mutations in the *Brassica napus* *FAD2.A5* gene identified in this study.

| Mutation                      | Change in property             | Mutation                       | Change in property           |
|-------------------------------|--------------------------------|--------------------------------|------------------------------|
| <i>A. Conservative Change</i> |                                | <i>C. Possibly hypomorphic</i> |                              |
| L151F                         | hydrophobic to hydrophobic     |                                |                              |
| L224F                         | hydrophobic to hydrophobic     | P159 L                         | hydrophilic to hydrophobic   |
| A231V                         | hydrophobic to hydrophobic     | P216L                          | hydrophilic to hydrophobic   |
| A208V                         | hydrophobic to hydrophobic     | P191L                          | hydrophilic to hydrophobic   |
| A245V                         | hydrophobic to hydrophobic     | P202L                          | hydrophilic to hydrophobic   |
| V308I                         | hydrophobic to hydrophobic     | G123D                          | polar neutral to hydrophilic |
| A244T                         | hydrophobic to polar neutral   | G257R                          | polar neutral to hydrophilic |
| A255T                         | hydrophobic to polar neutral   | G232D                          | polar neutral to hydrophilic |
| W190Q                         | hydrophobic to polar neutral   | G200R                          | polar neutral to hydrophilic |
| R153K                         | hydrophilic to hydrophilic     | G248R                          | polar neutral to hydrophilic |
| D230N                         | hydrophilic to hydrophilic     | S150F                          | polar neutral to hydrophobic |
| R242H                         | hydrophilic to hydrophilic     | T297I                          | polar neutral to hydrophobic |
| T183M                         | polar neutral to polar neutral | S199L                          | polar neutral to hydrophobic |
|                               |                                | G232S                          | polar neutral to hydrophobic |
|                               |                                | E152K                          | -charge to +charge           |
| <i>B. Likely Null</i>         |                                | E287K                          | -charge to +charge           |
| R142Q                         | In histidine box               |                                |                              |
| G108S                         | In histidine box               |                                |                              |
| V317M                         | In histidine box               |                                |                              |
| E106K                         | In histidine box               |                                |                              |
| S136F                         | = <i>Arabidopsis fad2-2</i>    |                                |                              |
