# Supplementary material
Source: PubMed Central journal article supplement (PMC6604813)
Supplement: NIHMS1034100-supplement-Tables3.pdf [file NIHMS1034100-supplement-Tables3.pdf]

**Supplemental Table S3.** Fatty acid compositions in seeds of *Brassica napus* lines with mutations in *FAD2* genes grown in a greenhouse.

| Line                                         | 16:00 | 16:01 | 18:00 | 18:01 | 18:02 | 18:03 | 20:00 | 20:01 |
|----------------------------------------------|-------|-------|-------|-------|-------|-------|-------|-------|
| HIOL112/HIOL103/HIOL109 (a5a5/c5c5/c1c1)     | 3.55  | 0.42  | 1.73  | 87.26 | 1.25  | 2.19  | 0.62  | 1.21  |
| HIOL112/HIOL103/HIOL109 (a5a5/c5c5/c1c1)     | 3.52  | 0.42  | 1.71  | 87.05 | 1.26  | 2.31  | 0.64  | 1.24  |
| HIOL112/HIOL103/HIOL109 (a5a5/c5c5/c1c1)     | 3.6   | 0.43  | 1.72  | 87.05 | 1.26  | 2.34  | 0.62  | 1.2   |
| HIOL112/HIOL103/HIOL109 (a5a5/c5c5/c1c1)     | 3.52  | 0.4   | 1.73  | 87.11 | 1.24  | 2.39  | 0.63  | 1.24  |
| HIOL112/HIOL103/HIOL109 (a5a5/c5c5/c1c1)     | 3.5   | 0.41  | 1.69  | 87.23 | 1.25  | 2.36  | 0.62  | 1.23  |
| HIOL112/HIOL103/HIOL109 (a5a5/c5c5/c1c1)     | 3.76  | 0.38  | 1.66  | 85.6  | 1.75  | 3.48  | 0.6   | 1.21  |
| HIOL112/HIOL103/HIOL109 (a5a5/c5c5/--)       | 3.81  | 0.38  | 1.67  | 85.33 | 1.75  | 3.5   | 0.63  | 1.25  |
| HIOL112/HIOL103/HIOL109 (a5a5/c5c5/--)       | 3.82  | 0.4   | 1.69  | 85.27 | 1.81  | 3.62  | 0.61  | 1.2   |
| HIOL112/HIOL103/HIOL109 (a5a5/c5c5/--)       | 3.75  | 0.4   | 1.6   | 85.81 | 1.7   | 3.38  | 0.6   | 1.24  |
| HIOL112/HIOL103/HIOL109 (a5a5/c5c5/--)       | 3.84  | 0.39  | 1.65  | 85.36 | 1.79  | 3.54  | 0.61  | 1.22  |
| HIOL112/HIOL103/HIOL109 (a5a5/--/c1c1)       | 4.43  | 0.47  | 1.86  | 74.2  | 8.33  | 7.73  | 0.66  | 1.06  |
| HIOL112/HIOL103/HIOL109 (a5a5/--/c1c1)       | 4.5   | 0.49  | 1.83  | 73.8  | 8.57  | 8.04  | 0.61  | 1.01  |
| HIOL112/HIOL103/HIOL109 (a5a5/--/c1c1)       | 4.41  | 0.47  | 1.82  | 74.03 | 8.54  | 7.85  | 0.63  | 1.05  |
| HIOL112/HIOL103/HIOL109 (a5a5/--/c1c1)       | 4.53  | 0.48  | 1.78  | 73.78 | 8.58  | 7.86  | 0.64  | 1.07  |
| HIOL112/HIOL103/HIOL109 (a5a5/--/c1c1)       | 4.48  | 0.48  | 1.85  | 74.03 | 8.55  | 7.78  | 0.62  | 1.02  |
| HIOL112/HIOL103/HIOL109 (a5a5/--/--)         | 4.04  | 0.34  | 1.67  | 72.63 | 10.04 | 8.27  | 0.58  | 1.17  |
| HIOL112/HIOL103/HIOL109 (a5a5/--/--)         | 4.07  | 0.34  | 1.62  | 72.32 | 10.3  | 8.31  | 0.58  | 1.18  |
| HIOL112/HIOL103/HIOL109 (a5a5/--/--)         | 4.06  | 0.34  | 1.7   | 72.79 | 10.02 | 8.02  | 0.61  | 1.19  |
| HIOL112/HIOL103/HIOL109 (a5a5/--/--)         | 4.07  | 0.34  | 1.7   | 72.91 | 10.03 | 7.91  | 0.6   | 1.16  |
| HIOL112/HIOL103/HIOL109 (a5a5/--/--)         | 4.13  | 0.35  | 1.65  | 72.23 | 10.3  | 8.23  | 0.6   | 1.19  |
| HIOL112/HIOL103/HIOL109 (--/c5c5/--)         | 4.81  | 0.44  | 1.74  | 69.1  | 12.6  | 8.37  | 0.62  | 1.04  |
| HIOL112/HIOL103/HIOL109 (--/c5c5/--)         | 4.79  | 0.44  | 1.79  | 68.63 | 12.87 | 8.49  | 0.63  | 1.04  |
| HIOL112/HIOL103/HIOL109 (--/c5c5/--)         | 4.65  | 0.42  | 1.73  | 69.22 | 12.57 | 8.44  | 0.63  | 1.06  |
| HIOL112/HIOL103/HIOL109 (--/c5c5/--)         | 4.71  | 0.43  | 1.73  | 69.11 | 12.55 | 8.48  | 0.63  | 1.07  |
| HIOL112/HIOL103/HIOL109 (--/c5c5/--)         | 4.71  | 0.43  | 1.69  | 68.93 | 12.79 | 8.49  | 0.61  | 1.06  |
| HIOL112/HIOL103/HIOL109 (--/--/c1c1)         | 4.28  | 0.33  | 1.71  | 63.15 | 18.48 | 9.03  | 0.61  | 1.06  |
| HIOL112/HIOL103/HIOL109 (--/--/c1c1)         | 4.28  | 0.34  | 1.75  | 63.07 | 18.54 | 9.14  | 0.58  | 1.02  |
| HIOL112/HIOL103/HIOL109 (--/--/c1c1)         | 4.25  | 0.34  | 1.77  | 63.71 | 18.13 | 8.95  | 0.58  | 1.02  |
| HIOL112/HIOL103/HIOL109 (--/--/c1c1)         | 4.25  | 0.34  | 1.78  | 63.3  | 18.3  | 9.16  | 0.59  | 1.01  |
| HIOL112/HIOL103/HIOL109 (--/--/c1c1)         | 4.37  | 0.34  | 1.75  | 63.21 | 18.44 | 9.03  | 0.59  | 1     |
| HIOL112/HIOL103/HIOL109 (--/--/--) Wild type | 4.96  | 0.43  | 1.74  | 62.24 | 18.53 | 9.17  | 0.62  | 1     |
| HIOL112/HIOL103/HIOL109 (--/--/--) Wild type | 5.08  | 0.44  | 1.71  | 61.72 | 18.77 | 9.17  | 0.64  | 1.03  |
| HIOL112/HIOL103/HIOL109 (--/--/--) Wild type | 4.97  | 0.42  | 1.65  | 62.07 | 18.71 | 9.1   | 0.62  | 1.05  |
| HIOL112/HIOL103/HIOL109 (--/--/--) Wild type | 5.01  | 0.45  | 1.7   | 61.62 | 19    | 9.27  | 0.62  | 1     |
| HIOL112/HIOL103/HIOL109 (--/--/--) Wild type | 5.08  | 0.44  | 1.63  | 61.51 | 19.26 | 9.09  | 0.61  | 1.01  |
| HIOL112/HIOL103/HIOL109 (a5a5/c5c5/c1c1)     | 3.62  | 0.37  | 1.42  | 86.45 | 1.31  | 2.69  | 0.62  | 1.39  |
| HIOL113/HIOL103/HIOL109 (a5a5/c5c5/c1c1)     | 3.66  | 0.39  | 1.37  | 86.54 | 1.33  | 2.68  | 0.59  | 1.38  |
| HIOL113/HIOL103/HIOL109 (a5a5/c5c5/c1c1)     | 3.65  | 0.38  | 1.4   | 86.41 | 1.31  | 2.72  | 0.61  | 1.42  |
| HIOL113/HIOL103/HIOL109 (a5a5/c5c5/c1c1)     | 3.66  | 0.39  | 1.38  | 86.5  | 1.31  | 2.7   | 0.58  | 1.39  |
| HIOL113/HIOL103/HIOL109 (a5a5/c5c5/c1c1)     | 3.7   | 0.39  | 1.37  | 86.4  | 1.31  | 2.72  | 0.59  | 1.41  |
| HIOL113/HIOL103/HIOL109 (a5a5/c5c5/--)       | 3.46  | 0.33  | 1.68  | 85.83 | 1.64  | 3.67  | 0.61  | 1.22  |
| HIOL113/HIOL103/HIOL109 (a5a5/c5c5/--)       | 3.49  | 0.35  | 1.69  | 85.66 | 1.71  | 3.69  | 0.61  | 1.22  |
| HIOL113/HIOL103/HIOL109 (a5a5/c5c5/--)       | 3.5   | 0.32  | 1.69  | 85.42 | 1.71  | 3.8   | 0.64  | 1.26  |
| HIOL113/HIOL103/HIOL109 (a5a5/c5c5/--)       | 3.53  | 0.33  | 1.66  | 85.6  | 1.69  | 3.67  | 0.63  | 1.26  |
| HIOL113/HIOL103/HIOL109 (a5a5/c5c5/--)       | 3.52  | 0.34  | 1.69  | 85.4  | 1.76  | 3.71  | 0.63  | 1.28  |
| HIOL113/HIOL103/HIOL109 (a5a5/--/c1c1)       | 4.02  | 0.36  | 1.7   | 74.71 | 8.01  | 8.28  | 0.6   | 1.11  |
| HIOL113/HIOL103/HIOL109 (a5a5/--/c1c1)       | 4.01  | 0.36  | 1.71  | 74.88 | 7.76  | 8.19  | 0.64  | 1.18  |
| HIOL113/HIOL103/HIOL109 (a5a5/--/c1c1)       | 4     | 0.36  | 1.74  | 75.1  | 7.77  | 8.16  | 0.6   | 1.12  |
| HIOL113/HIOL103/HIOL109 (a5a5/--/c1c1)       | 3.98  | 0.36  | 1.67  | 75.04 | 7.9   | 8.11  | 0.59  | 1.12  |
| HIOL113/HIOL103/HIOL109 (a5a5/--/c1c1)       | 4.04  | 0.37  | 1.68  | 75.07 | 8.04  | 7.86  | 0.61  | 1.12  |
| HIOL113/HIOL103/HIOL109 (--/c5c5/c1c1)       | 4.15  | 0.36  | 1.86  | 70.97 | 10.52 | 9.06  | 0.65  | 1.18  |
| HIOL113/HIOL103/HIOL109 (a5a5/--/--)         | 4.18  | 0.37  | 1.76  | 72.94 | 9.07  | 8.57  | 0.64  | 1.18  |
| HIOL113/HIOL103/HIOL109 (a5a5/--/--)         | 4.14  | 0.35  | 1.77  | 73.35 | 9.04  | 8.54  | 0.59  | 1.08  |
| HIOL113/HIOL103/HIOL109 (a5a5/--/--)         | 4.16  | 0.36  | 1.74  | 73.35 | 9.01  | 8.53  | 0.59  | 1.1   |
| HIOL113/HIOL103/HIOL109 (a5a5/--/--)         | 4.21  | 0.37  | 1.75  | 73.03 | 9.31  | 8.47  | 0.6   | 1.1   |
| HIOL113/HIOL103/HIOL109 (a5a5/--/--)         | 4.15  | 0.35  | 1.75  | 72.94 | 9.21  | 8.73  | 0.59  | 1.1   |

| Line                                     | 16:00 | 16:01 | 18:00 | 18:01 | 18:02 | 18:03 | 20:00 | 20:01 |
|------------------------------------------|-------|-------|-------|-------|-------|-------|-------|-------|
| HIOL114/HIOL103/HIOL109 (a5a5/c5c5/c1c1) | 3.93  | 0.34  | 1.88  | 70.22 | 11.52 | 9.17  | 0.64  | 1.08  |
| HIOL114/HIOL103/HIOL109 (a5a5/c5c5/c1c1) | 4     | 0.33  | 1.84  | 70.73 | 11.36 | 8.98  | 0.59  | 1.01  |
| HIOL114/HIOL103/HIOL109 (a5a5/c5c5/c1c1) | 4.04  | 0.35  | 1.81  | 70.62 | 11.48 | 8.94  | 0.58  | 1.04  |
| HIOL114/HIOL103/HIOL109 (a5a5/c5c5/c1c1) | 4.04  | 0.34  | 1.8   | 70.49 | 11.64 | 8.92  | 0.58  | 1.02  |
| HIOL114/HIOL103/HIOL109 (a5a5/c5c5/c1c1) | 3.99  | 0.35  | 1.81  | 70.83 | 11.4  | 8.87  | 0.58  | 1.02  |
| HIOL114/HIOL103/HIOL109 (a5a5/c5c5/--)   | 4.21  | 0.34  | 1.83  | 68.61 | 12.7  | 9.63  | 0.59  | 0.93  |
| HIOL114/HIOL103/HIOL109 (a5a5/c5c5/--)   | 4.17  | 0.34  | 1.88  | 68.77 | 12.33 | 9.76  | 0.6   | 0.94  |
| HIOL114/HIOL103/HIOL109 (a5a5/c5c5/--)   | 4.24  | 0.35  | 1.85  | 68.95 | 12.33 | 9.66  | 0.59  | 0.94  |
| HIOL114/HIOL103/HIOL109 (a5a5/c5c5/--)   | 4.3   | 0.36  | 1.83  | 68.52 | 12.77 | 9.53  | 0.59  | 0.92  |
| HIOL114/HIOL103/HIOL109 (a5a5/c5c5/--)   | 4.21  | 0.34  | 1.87  | 69.08 | 12.18 | 9.58  | 0.6   | 0.92  |
| HIOL114/HIOL103/HIOL109 (a5a5/--/c1c1)   | 4.22  | 0.34  | 2.04  | 62.33 | 18.27 | 10.22 | 0.6   | 0.86  |
| HIOL114/HIOL103/HIOL109 (a5a5/--/c1c1)   | 4.19  | 0.34  | 2.08  | 62.55 | 18.24 | 10.06 | 0.6   | 0.87  |
| HIOL114/HIOL103/HIOL109 (a5a5/--/c1c1)   | 4.21  | 0.33  | 2.05  | 62.21 | 18.62 | 9.98  | 0.61  | 0.87  |
| HIOL114/HIOL103/HIOL109 (a5a5/--/c1c1)   | 4.22  | 0.34  | 2.12  | 62.45 | 18.24 | 10    | 0.62  | 0.87  |
| HIOL114/HIOL103/HIOL109 (a5a5/--/c1c1)   | 4.21  | 0.35  | 2.04  | 62.65 | 18.16 | 10    | 0.61  | 0.86  |
| HIOL114/HIOL103/HIOL109 (a5a5/--/--)     | 4.33  | 0.35  | 1.69  | 60.86 | 19.25 | 10.86 | 0.55  | 0.91  |
| HIOL114/HIOL103/HIOL109 (a5a5/--/--)     | 4.32  | 0.36  | 1.67  | 61.01 | 19.4  | 10.61 | 0.54  | 0.9   |
| HIOL114/HIOL103/HIOL109 (a5a5/--/--)     | 4.35  | 0.36  | 1.66  | 61.16 | 19.25 | 10.6  | 0.54  | 0.9   |
| HIOL114/HIOL103/HIOL109 (a5a5/--/--)     | 4.35  | 0.35  | 1.63  | 60.87 | 19.59 | 10.6  | 0.53  | 0.88  |
| HIOL114/HIOL103/HIOL109 (a5a5/--/--)     | 4.3   | 0.36  | 1.67  | 61.26 | 19.16 | 10.6  | 0.55  | 0.91  |
| HIOL116/HIOL103/HIOL109 (a5a5/c5c5/c1c1) | 4.03  | 0.37  | 1.82  | 76.93 | 6.76  | 7.27  | 0.6   | 1.05  |
| HIOL116/HIOL103/HIOL109 (a5a5/c5c5/c1c1) | 3.96  | 0.36  | 1.77  | 77.31 | 6.6   | 7.23  | 0.59  | 1.03  |
| HIOL116/HIOL103/HIOL109 (a5a5/c5c5/c1c1) | 3.99  | 0.36  | 1.76  | 77.35 | 6.49  | 7.29  | 0.58  | 1.05  |
| HIOL116/HIOL103/HIOL109 (a5a5/c5c5/c1c1) | 3.96  | 0.36  | 1.76  | 77.33 | 6.57  | 7.33  | 0.57  | 1.03  |
| HIOL116/HIOL103/HIOL109 (a5a5/c5c5/c1c1) | 3.99  | 0.34  | 1.8   | 77.17 | 6.48  | 7.4   | 0.61  | 1.06  |
| HIOL116/HIOL103/HIOL109 (a5a5/c5c5/--)   | 4.2   | 0.35  | 1.78  | 74.85 | 8.04  | 7.96  | 0.59  | 1     |
| HIOL116/HIOL103/HIOL109 (a5a5/c5c5/--)   | 4.13  | 0.34  | 1.73  | 75.47 | 7.84  | 7.74  | 0.57  | 1.03  |
| HIOL116/HIOL103/HIOL109 (a5a5/c5c5/--)   | 4.07  | 0.34  | 1.66  | 75.56 | 7.79  | 7.84  | 0.56  | 1.04  |
| HIOL116/HIOL103/HIOL109 (a5a5/c5c5/--)   | 4.13  | 0.34  | 1.74  | 75.52 | 7.84  | 7.73  | 0.57  | 1.02  |
| HIOL116/HIOL103/HIOL109 (a5a5/c5c5/--)   | 4.13  | 0.33  | 1.73  | 75.71 | 7.65  | 7.82  | 0.55  | 1.01  |
| HIOL116/HIOL103/HIOL109 (a5a5/--/c1c1)   | 4.02  | 0.33  | 1.65  | 74.52 | 8.15  | 8.47  | 0.55  | 1.07  |
| HIOL116/HIOL103/HIOL109 (a5a5/--/c1c1)   | 4.12  | 0.37  | 1.65  | 73.57 | 9.13  | 8.34  | 0.53  | 1.08  |
| HIOL116/HIOL103/HIOL109 (a5a5/--/c1c1)   | 4.06  | 0.34  | 1.67  | 74.3  | 8.65  | 8.3   | 0.53  | 1.06  |
| HIOL116/HIOL103/HIOL109 (a5a5/--/c1c1)   | 4.03  | 0.33  | 1.69  | 74.8  | 7.85  | 8.16  | 0.63  | 1.17  |
| HIOL116/HIOL103/HIOL109 (a5a5/--/c1c1)   | 4.06  | 0.34  | 1.69  | 74.41 | 8.45  | 8.35  | 0.55  | 1.05  |
| HIOL116/HIOL103/HIOL109 (a5a5/--/--)     | 4.38  | 0.34  | 1.72  | 66.64 | 14.76 | 9.28  | 0.58  | 1.02  |
| HIOL116/HIOL103/HIOL109 (a5a5/--/--)     | 4.46  | 0.36  | 1.74  | 67.44 | 14.29 | 9.13  | 0.55  | 0.95  |
| HIOL116/HIOL103/HIOL109 (a5a5/--/--)     | 4.44  | 0.34  | 1.71  | 66    | 15.23 | 9.44  | 0.58  | 1     |
| HIOL116/HIOL103/HIOL109 (a5a5/--/--)     | 4.44  | 0.36  | 1.75  | 66.64 | 14.88 | 9.26  | 0.56  | 0.97  |
| HIOL116/HIOL103/HIOL109 (a5a5/--/--)     | 4.39  | 0.34  | 1.76  | 67.14 | 14.54 | 9.13  | 0.57  | 0.98  |
