# Supplementary material
Source: PubMed Central journal article supplement (PMC6604813)
Supplement: NIHMS1034100-supplement-Tables4.pdf [file NIHMS1034100-supplement-Tables4.pdf]

**Table S4.** Distribution of 18-carbon unsaturated fatty acids in seeds of *Brassica napus* lines with mutations in *FAD2* genes grown in the field.

| Genotype          | Percentage of total fatty acids |      |      |
|-------------------|---------------------------------|------|------|
|                   | 18:1                            | 18:2 | 18:3 |
| Wild type         | 61.0                            | 20.7 | 8.8  |
| <i>c5/c1</i>      | 69.2                            | 13.3 | 8.0  |
| <i>a5-1/c5</i>    | 82.5                            | 3.8  | 4.1  |
| <i>a5-1/c1</i>    | 72.4                            | 10.7 | 7.2  |
| <i>a5-1/c5/c1</i> | 83.0                            | 3.6  | 3.9  |
| <i>a5-2/c5</i>    | 81.7                            | 3.7  | 5.0  |
| <i>a5-2/c1</i>    | 72.7                            | 10.5 | 7.6  |
| <i>a5-2/c5/c1</i> | 81.1                            | 4.6  | 4.6  |
| <i>a5-3/c5</i>    | 73.6                            | 9.7  | 7.6  |
| <i>a5-3/c1</i>    | 72.9                            | 10.2 | 7.8  |
| <i>a5-3/c5/c1</i> | 76.0                            | 7.9  | 7.0  |
